# Supplementary material for: Unveiling the miR-26b-3p/XAF1 Axis: A New Frontier in Systemic Lupus Erythematosus Inflammation Running Head: miR-26b-3p–XAF1 regulation in lupus
Source: Research Square preprint supplement (doi:10.21203/rs.3.rs-7272649/v1), 2025-10-29

## Supplemental material

### *OENC* vs *OE*

XAF1(*OENC* vs *OE*)

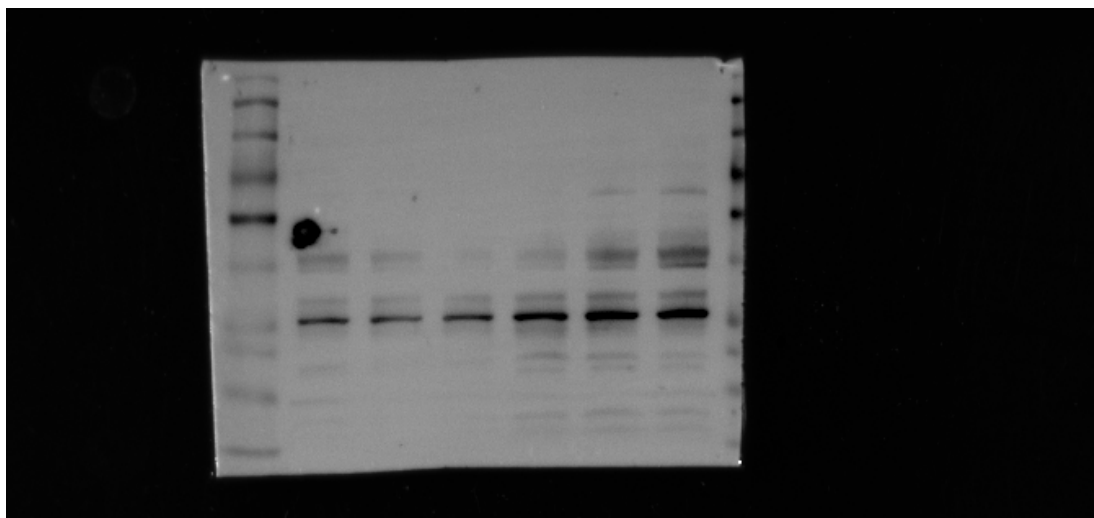

$\beta$ -actin (*OENC* vs *OE*)

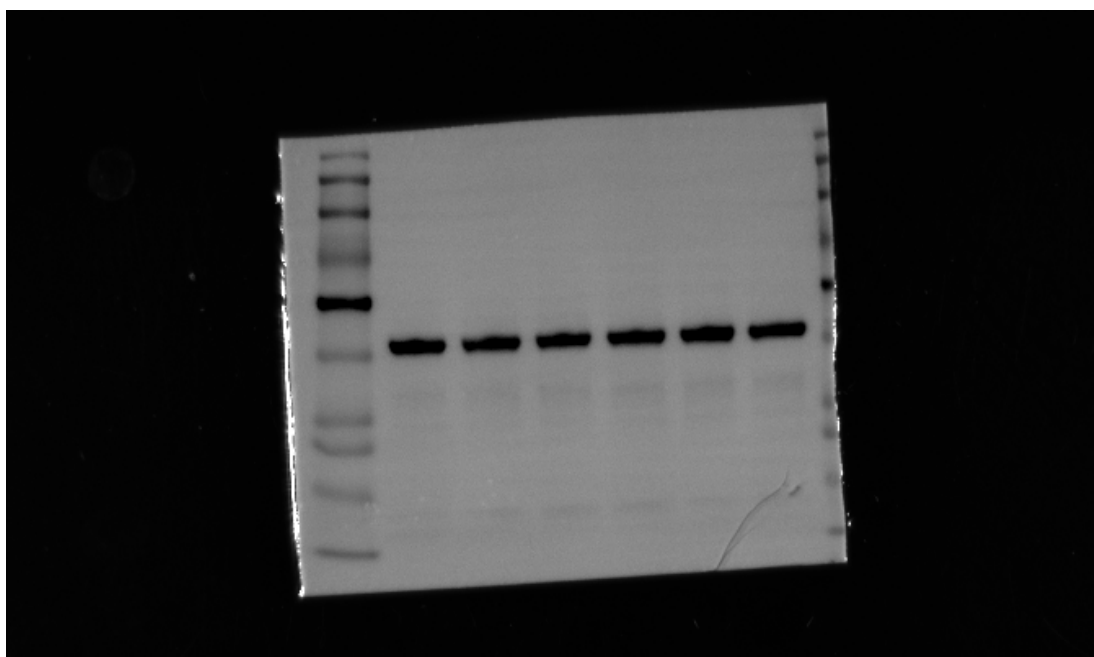

*SINC vs SI*

XAF1 (SINC vs SI)

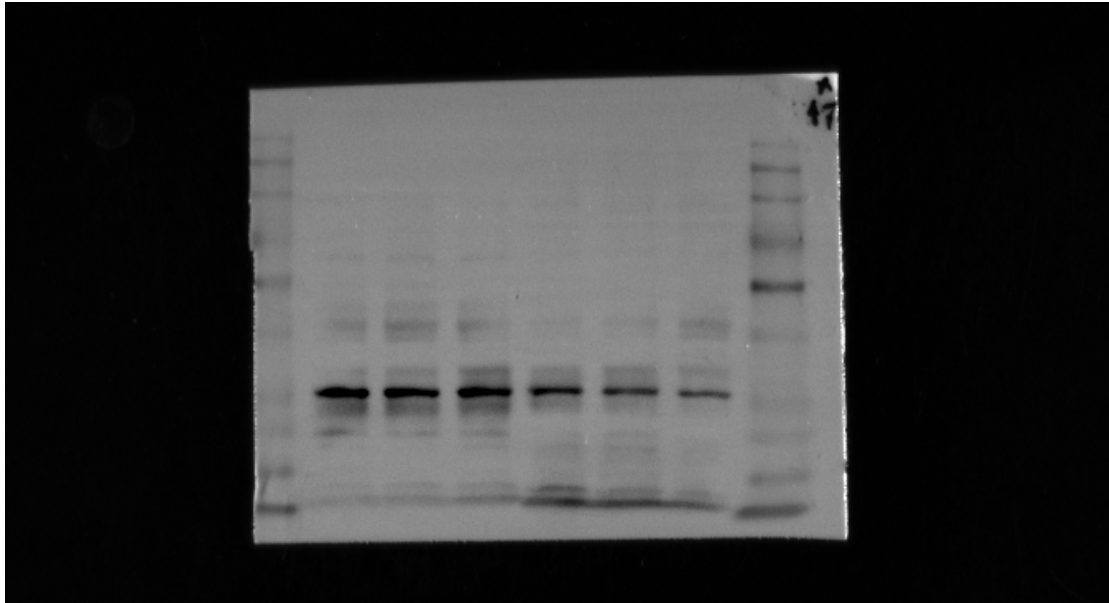

$\beta$ -actin (SINC vs SI)

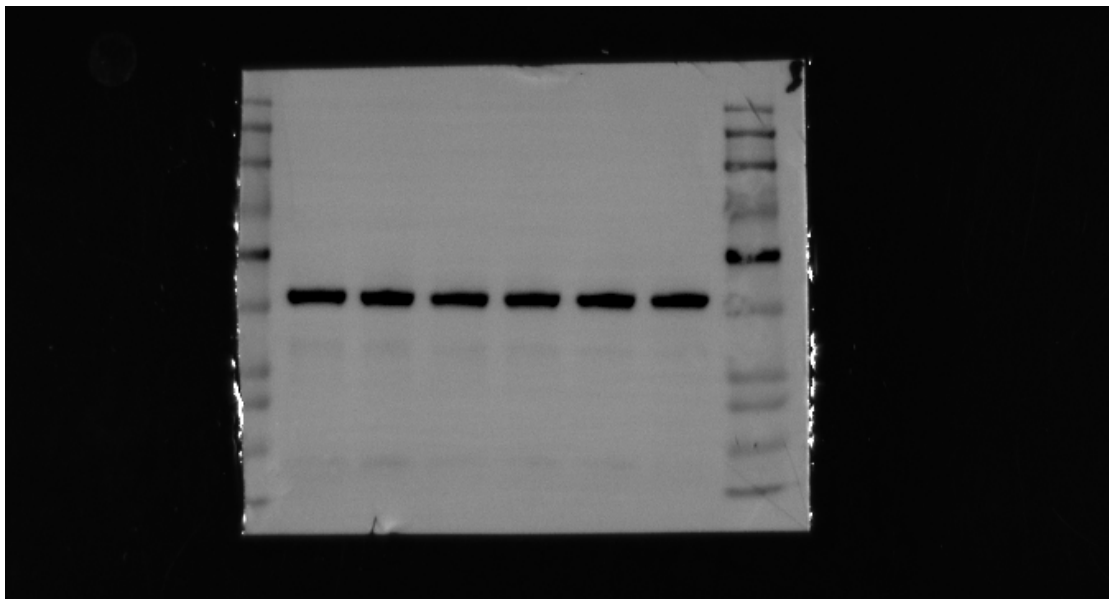

***THP-1: NC vs LPS***

XAF1 (NC vs LPS)

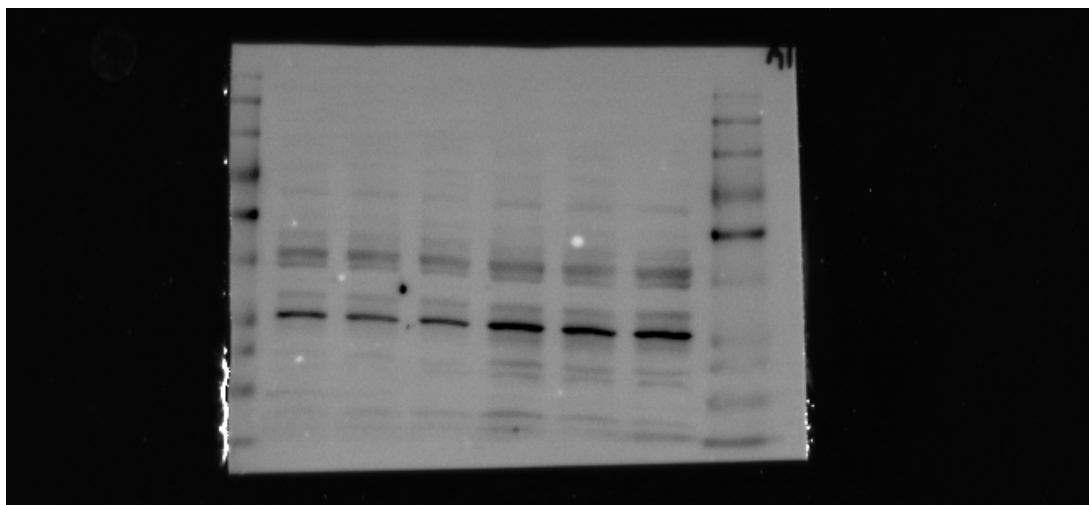

$\beta$ -actin (NC vs LPS)

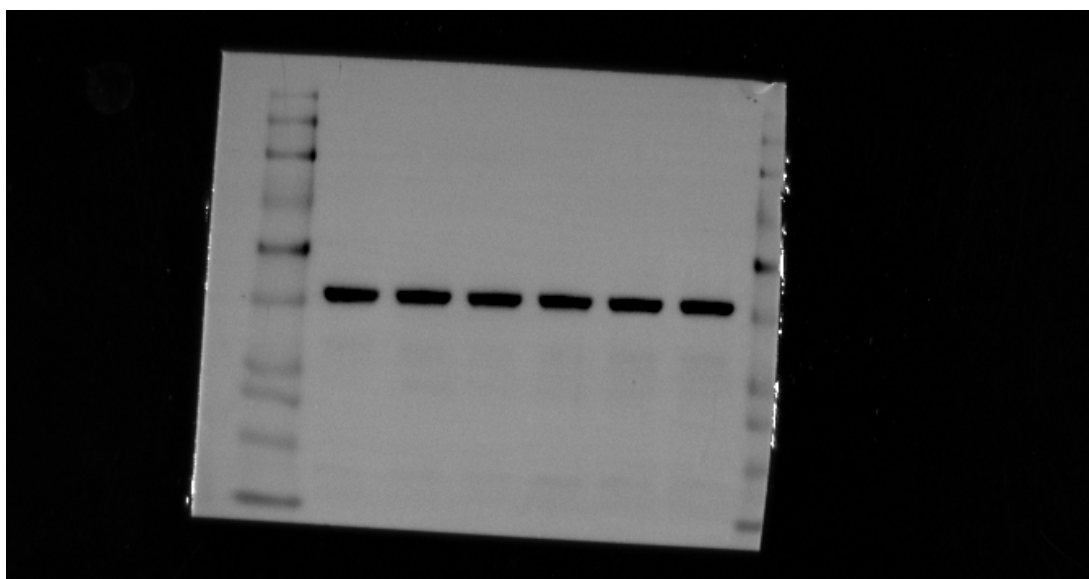

*PBMC: (NC vs LPS)*

XAF1 (NC vs LPS)2

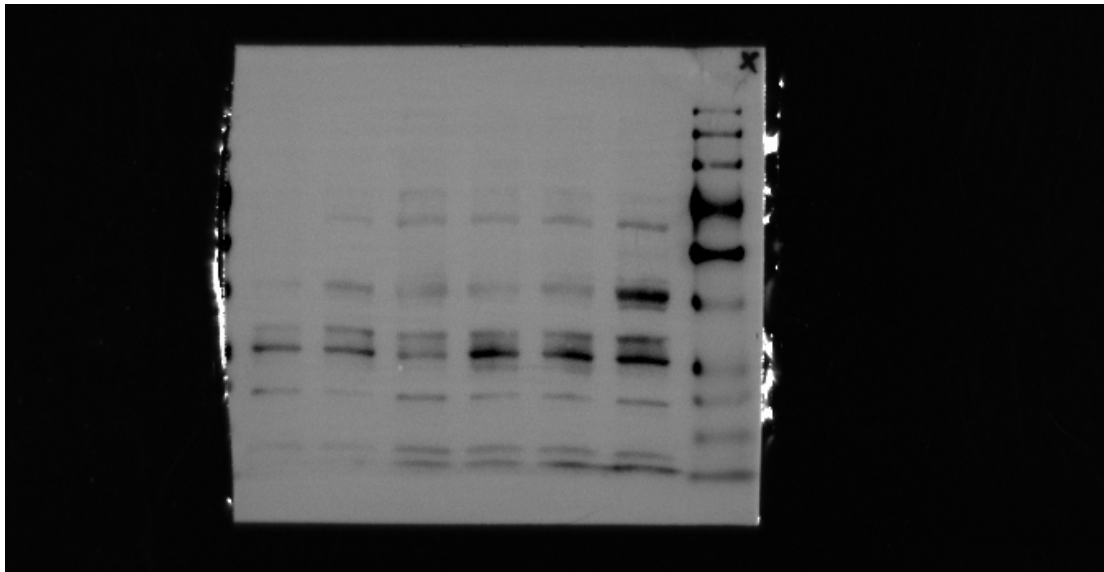

$\beta$ -actin (NC vs LPS)2

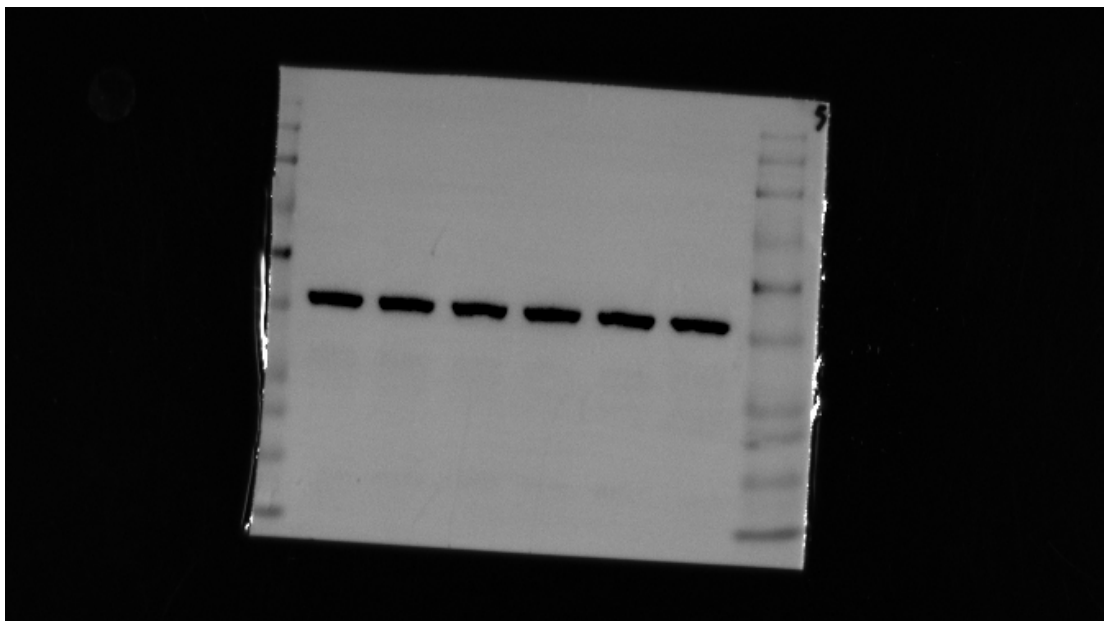

*InhibitorNC vs inhibitor*

XAF1 (inhibitor NC vs inhibitor)

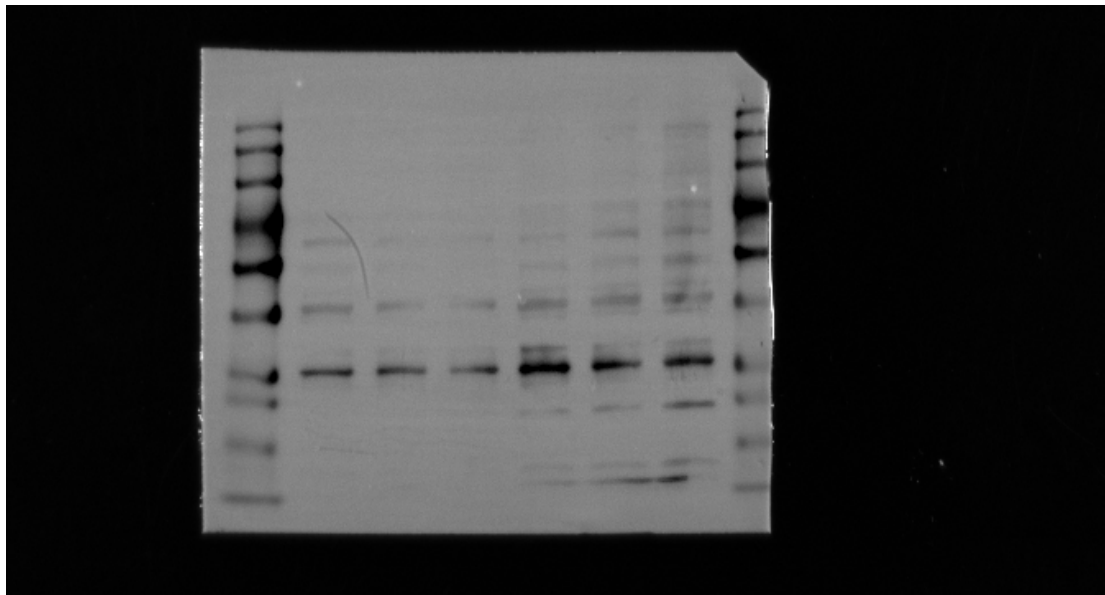

$\beta$ -actin (inhibitor NC vs inhibitor)

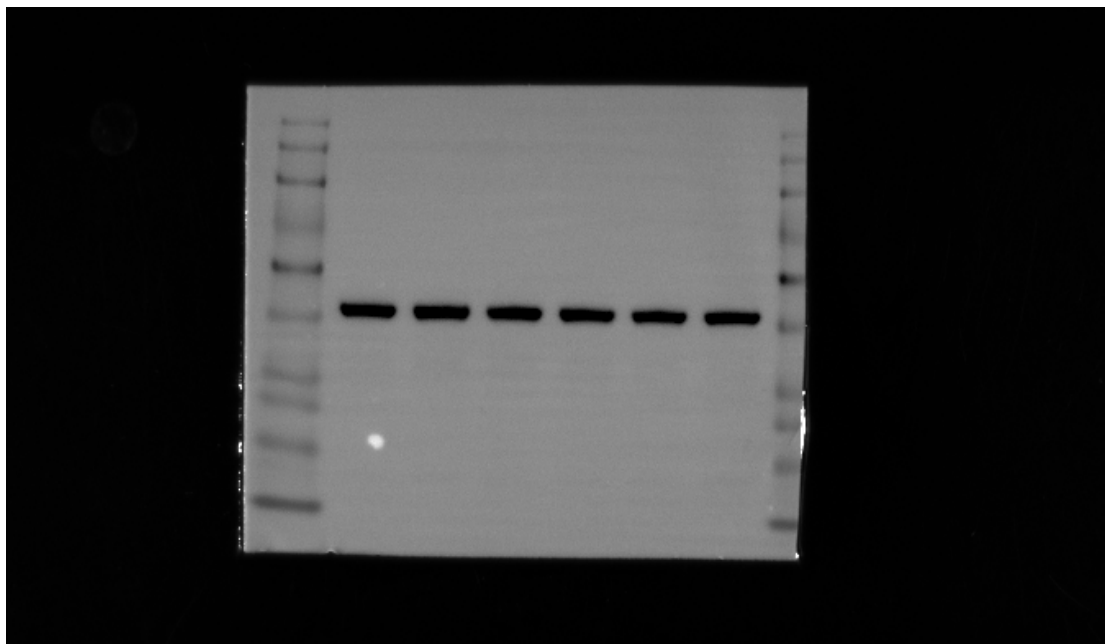

*Mimic NC vs mimics*

XAF1 (Mimics NC vs mimics)

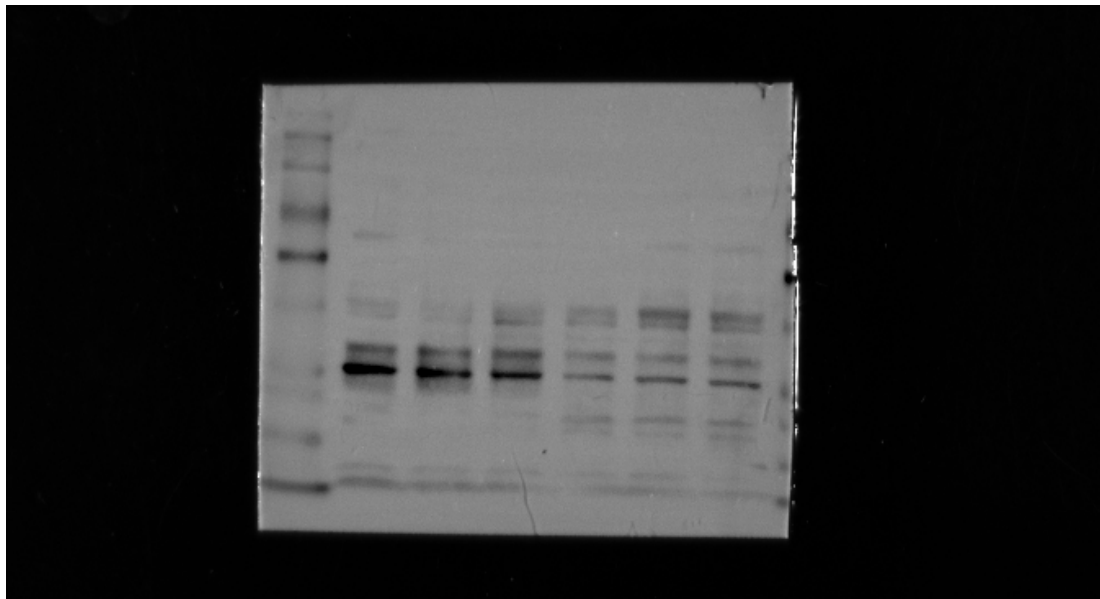

$\beta$ -actin (mimics NC vs mimics)

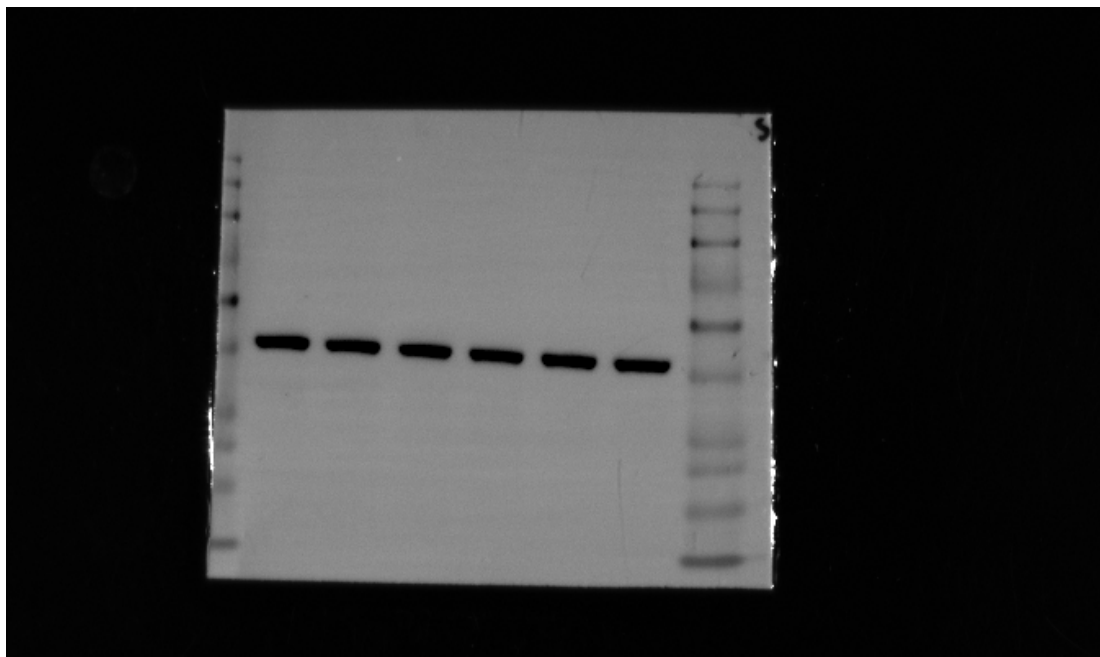

Supplement: Supplementary file 2 [file e5c65f9c47f550d640033f68.pdf]
